# Supplementary material for: A diverse global fungal library for drug discovery
Source: PeerJ. 2020 Nov 27;8:e10392. doi: 10.7717/peerj.10392 (PMC7703384; doi:10.7717/peerj.10392)
Supplement: Supplemental Information 2 [file peerj-08-10392-s002.xlsx]

## Sheet: Figure 3b
DMSO	37C6	100D3	22E8	45F10
13	0	0	0	265
120	0	122	0	123
170	0	97	0	65
140	0	16	0	210
11	0	143	0	34
105	0	115	0	227
115	9	37	0	0
35	0	29	0	124
33	1	26	0	123
88	0	12	0	156
18	0	216	1	23
54	3	10	0	6
58	0	82	0	129
38	0	50	0	44
27	0	16	0	50
140	1	41	0	84
75	0	27	1	76
45	0	30	0	1
24	0	21	0	32
200	0	5	0	19
105	1	130	0	22
7	0	0	0	55
0	5	0	0	51
155	0	2	0	23
38	0	0	0	4
0	0	52	0	43
64	0	105	0	31
65	0	120	1	21
220	0	136	0	0
19	0	11	0	1
34	0	89	0	44
165	0	222	0	54
19	0	2	0	11
	2	34	0	5
	0		0	32
	0		1	11
	0		0	48
	1		0	29
	0		12	34
	0		0	15
	0			2
	0			14
	0

## Sheet: Figure 3c
DMSO	37C6	22E8
4	27	0
5	3	0
0	8	1
2	2	16
32	0	0
44	1	0
4	32	0
0	11	0
18	0	0
15	0	0
7	0	47
0	2	12
0	0	5
0	68	0
1	0	10
14	14	2
2	2	0
17	2	0
105	0	4
13	0	1
8	0	0
3	31	2
2	1	0
0	0	0
11	6	1
1	3	1
1	40	2
15	0	0
0	9	0
4	29	7
6	6	0
0	2	6
0	10	3
22	12	0
7	0	0
0	0	67
2	0	0
2	1	13
0	3	6
14	0	32
0	1	3
0	0	0
1	7	2
14	2	5
36	3	15
	1	0
	5	0
	0	0
	5	0
	20	0
	0	3
	32	0
	12	14
	52	0
		26
		0
		0
		0
		17
		0
		0
