# Supplementary material for: A diverse global fungal library for drug discovery
Source: PeerJ. 2020 Nov 27;8:e10392. doi: 10.7717/peerj.10392 (PMC7703384; doi:10.7717/peerj.10392)
Supplement: Supplemental Information 4 [file peerj-08-10392-s004.xlsx]

## Sheet: Sheet1
Number	Growth rate (%)	Standard Deviation
1	108.3	12.4
2	105.9	21.9
3	99.8	8.9
4	99	2.4
5	97.1	3
6	69.3	4.7
7	93.2	4.5
8	91.1	2.9
9	89.8	5.6
10	85.2	5
11	84.1	6.4
12	77.2	6
13	73	3.7
14	68.4	9.8
15	65.6	10.5
16	64.3	10.9
17	40	3
18	110.2	10.8
19	102.3	23.6
20	77.9	16.2
21	82.6	10.1
22	36.8	2
23	87.1	3.7
24	77.4	5.9
25	92.6	2.1
26	85.4	10.2
27	95.2	5.9
28	92.1	2.4
29	24.8	6
30	73.2	4.1
31	86.8	7.5
32	95.9	3.7
33	97.1	3
34	93.6	9.7
35	50.5	5.7
36	91.1	2.9
37	89.8	5.6
38	85.2	5
39	84.1	6.4
40	83.1	10.4
41	102.3	10.5
42	79.8	5.6
43	84.1	10.4
44	93.5	3.1
45	85.4	10.7
46	72.6	10.2
47	91.2	2.5
48	109.8	5.7
49	84.4	3.9
50	96.1	6.3
