# Supplementary material for: A diverse global fungal library for drug discovery
Source: PeerJ journal article supplement (doi:10.7717/peerj.10392), 2020-11-27

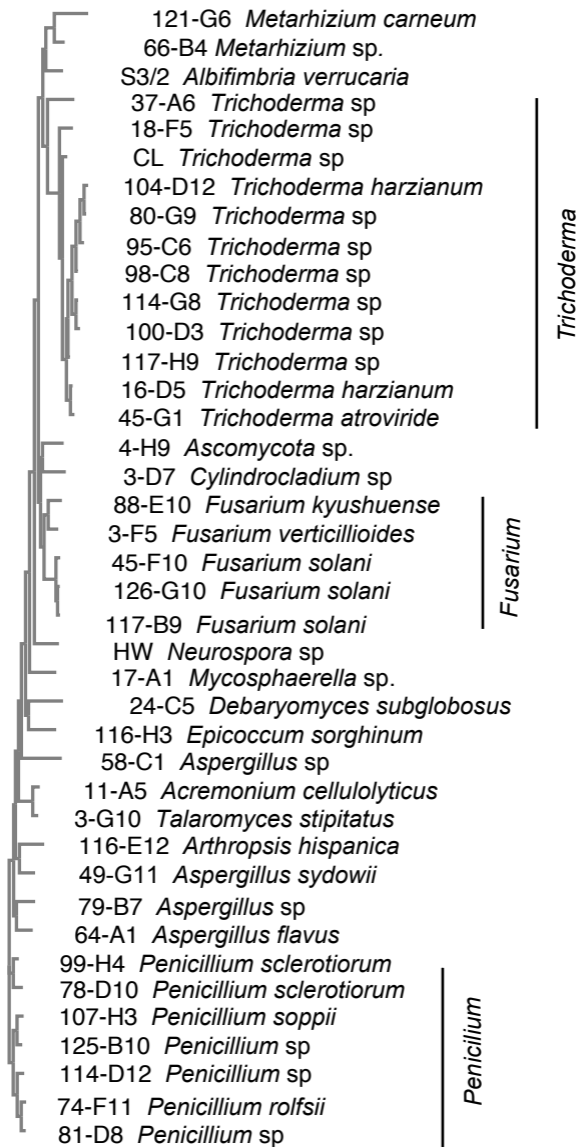

Supplement: SupplementalFile1_revised.pdf [file SupplementalFile1_revised.pdf]
